# Supplementary material
Source: publisher figshare collection journal article supplement (https://frontiersin.figshare.com/ndownloader/files/22654781)
Supplement: Supplementary file 1 [file 22654781]

Supplementary Material

**Phosphorus Dynamics in a Eutrophic Lagoon: Uptake and Utilization of Nutrient Pulses by Phytoplankton**

**Maximilian Berthold* and Rhena Schumann***

**Correspondence:** Maximilian Berthold Maximilian.berthold@uni-rostock.de

**FIGURES**

|  |
| --- |

Supplement figure 1 Free alkaline phosphatase activity (nmol l-1 h-1) in the filtrate and dissolved phosphate concentration (nmol l-1) at the Zingster Strom in 2014. Determination limit of DIP was at 50 nmol l-1.

|  |
| --- |

Supplement figure 2 Uptake kinetics of external dissolved inorganic phosphate (DIP nmol l-1) as seasonal median (normalised values nmol DIP µg-1 Chlorophyll *a*) for the Ribnitzer See and the Zingster Strom within one to 24 hours after DIP addition. Winter – December, January, February; Spring – March, April, May; Summer – June, July, August; Autumn – September, October, November.
